# Supplementary material for: Nonusage Attrition of Adolescents in an mHealth Promotion Intervention and the Role of Socioeconomic Status: Secondary Analysis of a 2-Arm Cluster-Controlled Trial
Source: PubMed Central journal article supplement (PMC9131163; doi:10.2196/36404), 2022-05-10
Supplement: mhealth_v10i5e36404_app2.pdf [file mhealth_v10i5e36404_app2.pdf]

Telenet 11:46 89%



20



# # LIFE GOALS



MY AGENDA



SET MISSION



GRAPHS



TOOLS



COINS



#LIFEGOALS



TIPS & TRICKS

HOME CHALLENGES CHATBOT PROFILE

The self-regulation components:

- Set Mission: goal setting and action planning
- My Agenda: goal setting and action planning
- Tools: coping planning
- Graphs: self-monitoring

The narrative:

- #LIFEGOALS

The chatbot:

- Chatbot (in the bottom bar)

Information on the benefits of health behaviors and on relevant (youth) health organizations for further information or support:

- Tips and Tricks

Reward system:

- Coins
- Challenges (to earn extra coins)
- Avatar (left in the upper corner, by clicking on it they could further pimp the avatar)
