# Supplementary material for: Nonusage Attrition of Adolescents in an mHealth Promotion Intervention and the Role of Socioeconomic Status: Secondary Analysis of a 2-Arm Cluster-Controlled Trial
Source: PubMed Central journal article supplement (PMC9131163; doi:10.2196/36404), 2022-05-10
Supplement: mhealth_v10i5e36404_app5.pdf [file mhealth_v10i5e36404_app5.pdf]

REASONS WHY ADOLESCENTS STOPPED USING THE #LIFEGOALS-APP

| I do not use the #LIFEGOALS app anymore because... (n=44)   | Strongly disagree |       | Disagree |       | Neutral |       | Agree |       | Strongly agree |       |
|-------------------------------------------------------------|-------------------|-------|----------|-------|---------|-------|-------|-------|----------------|-------|
|                                                             | n                 | %     | n        | %     | n       | %     | n     | %     | n              | %     |
| <b>the app takes too much time</b>                          | n=6               | 13.6% | n=9      | 20.5% | n=16    | 36.4% | n=7   | 15.9% | n=6            | 13.6% |
| <i>Academic track</i>                                       | n=5               | 15.6% | n=7      | 21.9% | n=12    | 37.5% | n=4   | 12.5% | n=4            | 12.5% |
| <i>Non-academic track</i>                                   | n=1               | 8.3%  | n=2      | 16.7% | n=4     | 33.3% | n=3   | 25.0% | n=2            | 16.7% |
| <b>I am not allowed to use my mobile phone much at home</b> | n=23              | 52.3% | n=9      | 20.5% | n=7     | 15.9% | n=5   | 11.4% | n=0            | 0.0%  |
| <i>Academic track</i>                                       | n=16              | 50.0% | n=7      | 21.9% | n=5     | 15.6% | n=4   | 12.5% | n=0            | 0.0%  |
| <i>Non-academic track</i>                                   | n=7               | 58.3% | n=2      | 16.7% | n=2     | 16.7% | n=1   | 8.3%  | n=0            | 0.0%  |
| <b>I already live a sufficiently healthy life</b>           | n=2               | 4.5%  | n=4      | 9.1%  | n=22    | 50.0% | n=10  | 22.7% | n=6            | 13.6% |
| <i>Academic track</i>                                       | n=0               | 0.0%  | n=4      | 12.5% | n=16    | 50.0% | n=7   | 21.9% | n=5            | 15.6% |
| <i>Non-academic track</i>                                   | n=2               | 16.7% | n=0      | 0.0%  | n=6     | 50.0% | n=3   | 25.0% | n=1            | 8.3%  |
| <b>there were technical problems with the app</b>           | n=21              | 47.7% | n=8      | 18.2% | n=6     | 13.6% | n=4   | 9.1%  | n=5            | 11.4% |
| <i>Academic track</i>                                       | n=14              | 43.8% | n=6      | 18.8% | n=4     | 12.5% | n=3   | 9.4%  | n=5            | 15.6% |
| <i>Non-academic track</i>                                   | n=7               | 58.3% | n=2      | 16.7% | n=2     | 16.7% | n=1   | 8.3%  | n=0            | 0.0%  |
| <b>the app was too complicated</b>                          | n=11              | 25.0% | n=10     | 22.7% | n=12    | 27.3% | n=10  | 22.7% | n=1            | 2.3%  |
| <i>Academic track</i>                                       | n=9               | 28.1% | n=8      | 25.0% | n=9     | 28.1% | n=6   | 18.8% | n=0            | 0.0%  |
| <i>Non-academic track</i>                                   | n=2               | 16.7% | n=7      | 16.7% | n=3     | 25.0% | n=4   | 33.3% | n=1            | 8.3%  |
| <b>I did not like the app</b>                               | n=4               | 9.1%  | n=6      | 13.6% | n=17    | 38.6% | n=13  | 29.5% | n=4            | 9.1%  |
| <i>Academic track</i>                                       | n=3               | 9.4%  | n=3      | 9.4%  | n=13    | 40.6% | n=11  | 34.4% | n=2            | 6.3%  |
| <i>Non-academic track</i>                                   | n=1               | 8.3%  | n=3      | 25.0% | n=4     | 33.3% | n=2   | 16.7% | n=2            | 16.7% |
| <b>my behavior did not change by using the app</b>          | n=4               | 9.1%  | n=5      | 11.4% | n=11    | 25.0% | n=12  | 27.3% | n=12           | 27.3% |
| <i>Academic track</i>                                       | n=3               | 9.4%  | n=5      | 15.6% | n=8     | 25.0% | n=9   | 28.1% | n=7            | 21.9% |
| <i>Non-academic track</i>                                   | n=1               | 8.3%  | n=0      | 0.0%  | n=3     | 25.0% | n=3   | 25.0% | n=5            | 41.7% |
| <b>the app did not meet my expectations</b>                 | n=4               | 9.1%  | n=15     | 34.1% | n=18    | 40.9% | n=4   | 9.1%  | n=3            | 6.8%  |
| <i>Academic track</i>                                       | n=2               | 6.3%  | n=11     | 34.4% | n=13    | 40.6% | n=4   | 12.5% | n=2            | 6.3%  |
| <i>Non-academic track</i>                                   | n=2               | 16.7% | n=4      | 33.3% | n=5     | 41.7% | n=0   | 0.0%  | n=1            | 8.3%  |
| <b>my friends did not use the app either</b>                | n=9               | 20.5% | n=13     | 29.5% | n=15    | 34.1% | n=5   | 11.4% | n=2            | 4.5%  |
| <i>Academic track</i>                                       | n=8               | 25.0% | n=9      | 28.1% | n=11    | 34.4% | n=2   | 6.3%  | n=2            | 6.3%  |
| <i>Non-academic track</i>                                   | n=1               | 8.3%  | n=4      | 33.3% | n=4     | 33.3% | n=3   | 25.0% | n=0            | 0.0%  |

|                                                                                              |      |       |      |       |      |       |      |       |     |       |
|----------------------------------------------------------------------------------------------|------|-------|------|-------|------|-------|------|-------|-----|-------|
| I did not get enough reminders to use the app                                                | n=8  | 18.2% | n=11 | 25.0% | n=15 | 34.1% | n=8  | 18.2% | n=2 | 4.5%  |
| <i>Academic track</i>                                                                        | n=3  | 9.4%  | n=8  | 25.0% | n=12 | 37.5% | n=7  | 21.9% | n=2 | 6.3%  |
| <i>Non-academic track</i>                                                                    | n=5  | 41.7% | n=3  | 25.0% | n=3  | 25.0% | n=1  | 8.3%  | n=0 | 0.0%  |
| I was not motivated by my environment to keep using the app (e.g. at home, by friends, etc.) | n=4  | 9.1%  | n=7  | 15.9% | n=18 | 40.9% | n=10 | 22.7% | n=5 | 11.4% |
| <i>Academic track</i>                                                                        | n=2  | 6.3%  | n=3  | 9.4%  | n=14 | 43.8% | n=10 | 31.3% | n=3 | 9.4%  |
| <i>Non-academic track</i>                                                                    | n=6  | 50.0% | n=1  | 8.3%  | n=1  | 8.3%  | n=2  | 16.7% | n=2 | 16.7% |
| I already use other apps to track and/or improve my lifestyle (e.g. Fitbit app)              | n=12 | 27.3% | n=5  | 11.4% | n=10 | 22.7% | n=12 | 27.3% | n=5 | 11.4% |
| <i>Academic track</i>                                                                        | n=6  | 18.8% | n=4  | 12.5% | n=9  | 28.1% | n=10 | 31.3% | n=3 | 9.4%  |
| <i>Non-academic track</i>                                                                    | n=6  | 50.0% | n=1  | 8.3%  | n=1  | 8.3%  | n=2  | 16.7% | n=2 | 16.7% |
| there are other things in my life I consider more important than my health                   | n=6  | 13.6% | n=13 | 29.5% | n=18 | 40.9% | n=5  | 11.4% | n=2 | 4.5%  |
| <i>Academic track</i>                                                                        | n=4  | 12.5% | n=11 | 34.4% | n=14 | 43.8% | n=3  | 9.4%  | n=0 | 0.0%  |
| <i>Non-academic track</i>                                                                    | n=2  | 16.7% | n=2  | 16.7% | n=4  | 33.3% | n=2  | 16.7% | n=2 | 16.7% |
| the chatbot often answered my questions incorrectly                                          | n=14 | 31.8% | n=8  | 18.2% | n=16 | 36.4% | n=6  | 13.6% | n=0 | 0.0%  |
| <i>Academic track</i>                                                                        | n=9  | 28.1% | n=7  | 21.9% | n=12 | 37.5% | n=4  | 12.5% | n=0 | 0.0%  |
| <i>Non-academic track</i>                                                                    | n=5  | 41.7% | n=1  | 8.3%  | n=4  | 33.3% | n=2  | 16.7% | n=0 | 0.0%  |
